# Supplementary material
Source: PubMed Central journal article supplement (PMC1489898)
Supplement: plntphys_pp.106.080069_1.pdf [file plntphys_pp.106.080069_1.pdf]

## SUPPLEMENTAL DATA

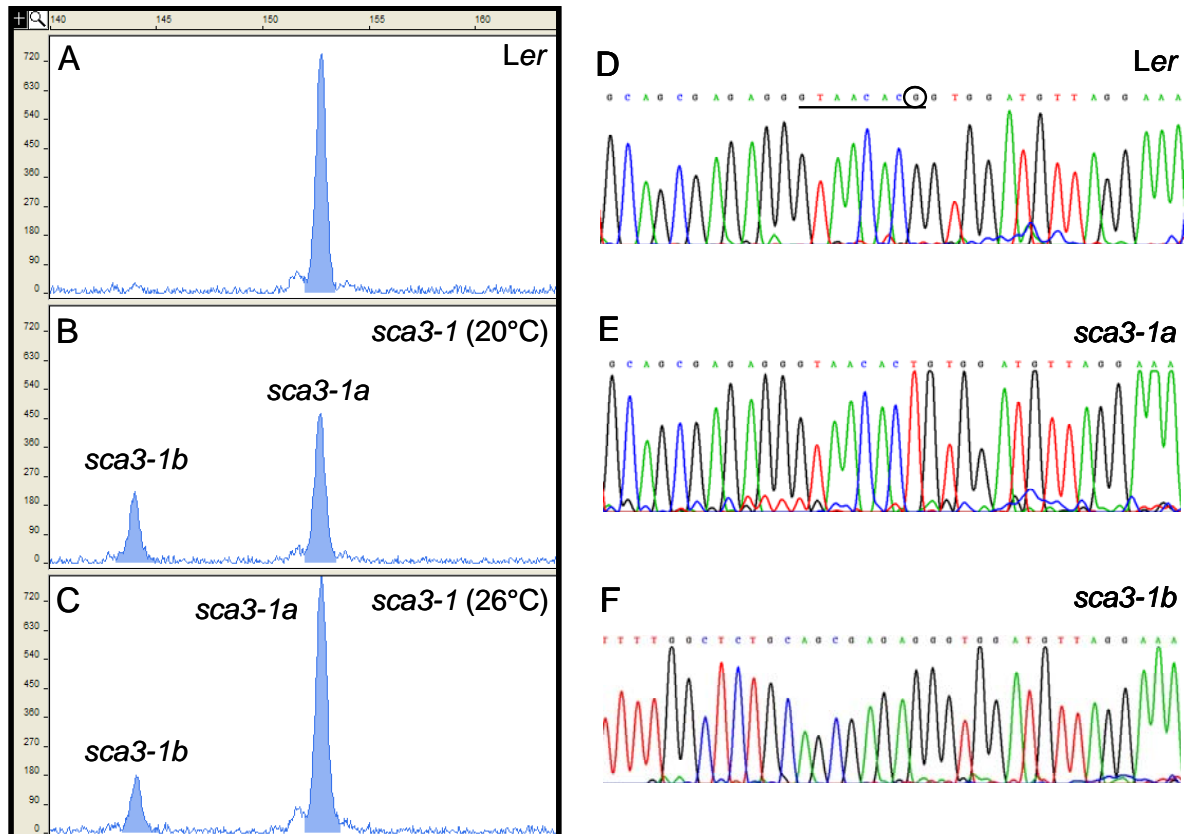

**Supplemental Figure 1.** (A-C) Fragment analysis electropherograms illustrating fluorescence-based detection of SCA3 cDNAs, performed following the method described in Ponce et al. (2000). Total RNA was extracted from leaves of the *Ler* wild-type (A), and the *sca3-1* mutant (B, C) grown at 20°C (B) and 26°C (C). Two SCA3 splice forms are present in the mutant, whose lengths differ in 8 nt. The horizontal and vertical axes indicate, respectively, the size of the electrophoresed molecules (in nucleotides) and the intensity of fluorophore emissions (in arbitrary units of fluorescent signal strength). The electropherograms were produced by the Genescan 3.7 software and had been simplified by removing the peaks corresponding to the internal molecular weight standard. Every peak is denoted with the name of the mRNA to which it corresponds. (D-F) Sequencing electropherograms showing the 16th-17th exon junction region of the SCA3 gene in cDNA obtained from the wild-type *Ler* (D), and the *sca3-1a* (E) and *sca3-1b* (F) splice forms found in the *sca3-1* mutant. The F10 forward primer and the *sca3-1aR* and *sca3-1bR* reverse primers (Supplemental Table 1) allowed the separate amplification of the *sca3-1a* and *sca3-1b* cDNAs, which were sequenced using the F10 primer. A circle indicates the nucleotide change found in *sca3-1a*. The 8-nt segment absent from *sca3-1b* mRNA is underlined.

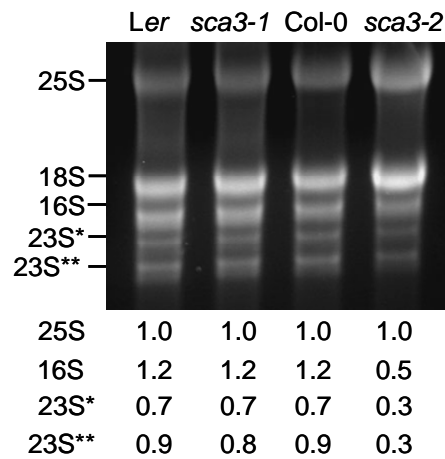

**Supplemental Figure 2.** rRNA abundance in the *sca3* mutants. Total RNA was extracted from 3-week-old wild-type (*Ler* and *Col-0*), and *sca3-1/sca3-1* and *sca3-2/sca3-2* mutant plants. Eight  $\mu$ g from each line were separated on a denaturing formaldehyde gel and visualized by ethidium bromide staining. The asterisks denote the *in vivo* breakdown product of chloroplast 23S rRNA. Numbers at the bottom indicate the levels of chloroplast 16S, 23S\* and 23S\*\* rRNAs relative to those of the cytoplasmic 25S rRNA in a given sample. rRNA quantification was performed using the Image-J program (<http://rsb.info.nih.gov/ij/docs/menus/file.html>).

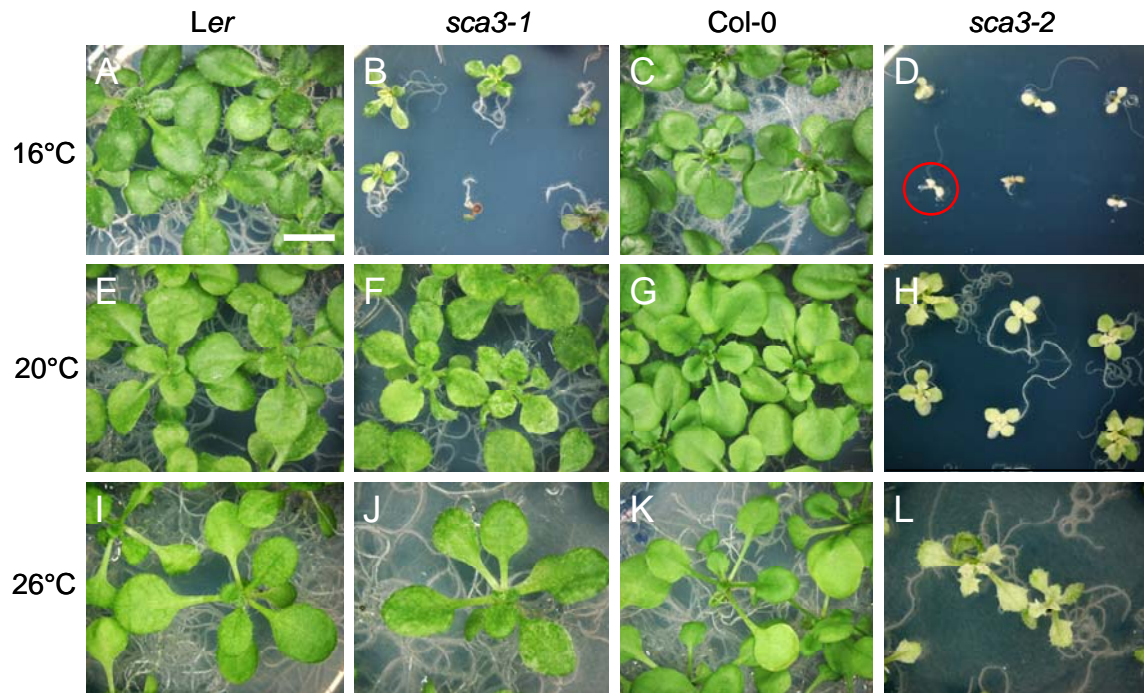

**Supplemental Figure 3.** Cold sensitivity of the *sca3* mutants. Plants were grown at the temperatures shown. A circle highlights a *sca3-2/sca3-2* seedling grown at 16°C and arrested in the stage of expanded cotyledons, a phenotype never observed in the wild types. All plants were homozygous for the mutations shown. Pictures were taken 21 days after sowing. The scale bar indicates 5 mm.

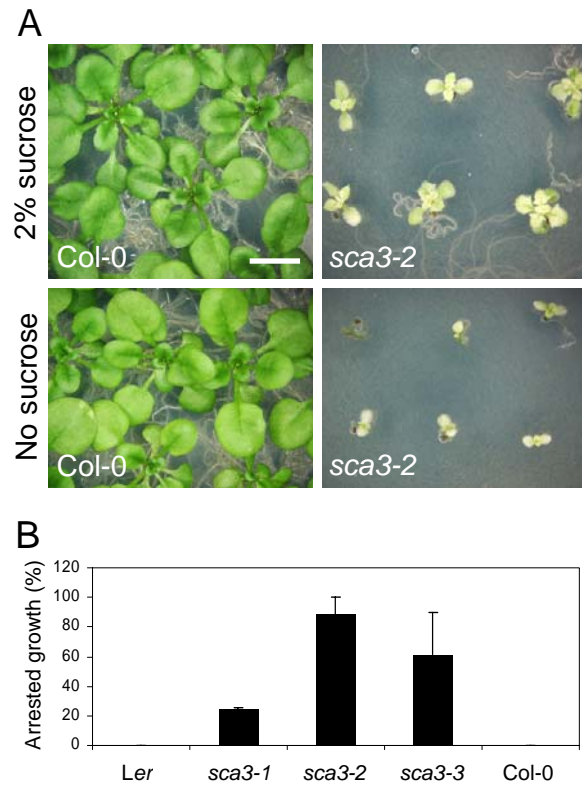

**Supplemental Figure 4.** Effect of sucrose on the growth of the *sca3-2* mutant. (A) Nineteen-day-old plants grown on culture media in the presence or absence of sucrose. All plants were homozygous for the mutations shown. The scale bar indicates 5 mm. (B) Percentage of plants with arrested development caused by the absence of sucrose. Data are means of two different replicates of 50-100 seeds, scored three weeks after sowing. We considered as arrested those seedlings displaying expanded cotyledons and a first pair of leaves of small size.

**Supplemental Table 1. Primers used in this work**

| Purpose Primer names<br>(Forward/Reverse) |                               | Oligonucleotide sequences (5'→3') |                              |
|-------------------------------------------|-------------------------------|-----------------------------------|------------------------------|
|                                           |                               | Forward primer                    | Reverse primer               |
| RT-PCR and cycle sequencing               | At2g24120F1/R1                | GGGATATTTAATGTTTCATATTCC          | CACGACTCAACACATCATTTTC       |
|                                           | At2g24120F2/R2                | GCTCCTCATATTGAGCTTTTG             | CACAGCATTTCATACGTAAG         |
|                                           | At2g24120F3/R3                | CAGGCTAAGCATATGTAAATTC            | GAATCCATTATATCATCCAAATG      |
|                                           | At2g24120F4/R4                | CGTGAACCCCTGGAGTTTC               | ACCATATACTGACGTCATTAC        |
|                                           | At2g24120F5/R5                | TGTCAGGTGTAGCTTCTTATG             | GCAGTTTAGTTCTGTCAATTC        |
|                                           | At2g24120F6/R6                | GCAGTTTAGTTCTGTCAATTC             | ATCAGTTTGTCTTTCTTGAC         |
|                                           | At2g24120F7/R7                | TGAAACATATGTTCTTGGGATG            | TAAACCTGTGTCTGAATGCAG        |
|                                           | At2g24120F8/R8                | CCTCTATGCAGGTGGTGTG               | GATAAGGATCTTGCCAGTGC         |
|                                           | At2g24120F9 <sup>a</sup> /R10 | TGCAGAAGTGAAAGACATCTG             | AACAGCAGTCATCATCATGTG        |
|                                           | At2g24120F10                  | GCTGCTGCTTGCTATTCTGCA             |                              |
|                                           | sca3-1aR                      |                                   | TTCCTAACATCCACAGTGTTAC       |
|                                           | sca3-1bR                      |                                   | TTCCTAACATCCACCCTCTCG        |
|                                           | OTC3D/R                       | TCCTTGCCAAATCATGGCCG              | GCATGCATGCGATTCTCCGC         |
| Confirmation of<br>T-DNA inserts          | LBa1                          | TGGTTCACGTAGTGGGCCATCG            |                              |
|                                           | LBb1                          | GCGTGGAACCGCTTGCTGCAACT           |                              |
|                                           | RpoTmpF1/R1 <sup>b</sup>      | TCTCATATGATGATGACTGC              | CATTACTTTCTTTATCAGTT         |
|                                           | BastaF1/R1 <sup>b</sup>       | GTCCAGCTGCCAGAAACCCACGTCATG       | CCATCGTCAACCACTACATCGAGACAAG |
| qRT-PCR                                   | PE-At1g68990F/R               | GGAGCCAGTATATGAGGCTTTA            | CTCTTCTGGAATGGGTACATCTT      |
|                                           | PE-At5g15700F/R               | GGTAGCGAAAGGAAGCATGAAT            | GCTTGGCTCCATGAGTTTTTCAT      |
|                                           | PE-At2g24120F/R               | CTTGGTGATTGTGCAAGATAATT           | GGGAGGAAATGCAGTTCTTTGTT      |
|                                           | PE-ArthCp048F/R               | GGTTGACATATAACAACCGACTTT          | CCATCCACCAGGAGAGTTTATA       |
|                                           | PE-ArthCp044F/R               | GACGGGTGAATAGAGTGACTTT            | GGAGTCGACTCACTTCTTTCAA       |
|                                           | PE-ArthCp031F/R               | GCTAAGTAAAGCAATGGATAGTTT          | CGAATGTCCTTGAGCTAACTAA       |
|                                           | PE-Atcg00190F/R               | GCAGGTTAGAATTAGAGATTGATA          | GGGTAGCAAACATTCTCTAGAAT      |
|                                           | PE-ArthCp013F/R               | GCCTAGTATACTGCGATTTTTC            | CTCGATTTGCAAATATATCGAAAC     |
|                                           | PE-At1g24260F/R               | TTAGCAGTTGAACTTAGTAGCC            | CCAAGATCTTCTCCCAACAGAT       |
|                                           | PE-At1g30380F/R               | CCTGTACAAGGCCTGGCAA               | CTGATGGCGCAAGTCCGAAT         |
|                                           | PE-At1g64860F/R               | CACACCCTCCATTGATAGGATT            | CCAGGGAGACCATTCAAAGAA        |
|                                           | PE-At2g05070F/R               | CTCCCCAAAGCATCTGGTAT              | CCCATCTGCTGTGGATTACTT        |
|                                           | PE-At5g67030F/R               | GGCATTGGTCTAAGGTGAGAA             | CAGACTCGATATCCGCTGGTA        |
|                                           | PE-OTCF/R                     | TGAAGGGACAAAGGTTGTGTA             | CGCAGACAAAGTGGAATGGA         |

<sup>a</sup>Primer labeled with 6-FAM phosphoramidite. <sup>b</sup>Primers used to confirm the presence of a T-DNA insertion in the *rpoT;2* mutant.

**Supplemental Table 2.** Chlorophyll and carotenoid content in the *sca3* mutants

| Genotype             | Chlorophyll a   | Chlorophyll b   | Carotenoids    |
|----------------------|-----------------|-----------------|----------------|
| Col-0                | 999.40 ± 122.05 | 421.18 ± 130.24 | 288.28 ± 77.34 |
| <i>sca3-2/sca3-2</i> | 193.32 ± 70.86  | 39.70 ± 12.48   | 93.74 ± 23.91  |
| <i>Ler</i>           | 993.91 ± 122.14 | 482.22 ± 140.67 | 256.03 ± 35.17 |
| <i>sca3-1/sca3-1</i> | 612.34 ± 148.80 | 236.95 ± 99.94  | 215.12 ± 43.31 |

Chlorophylls and carotenoids were extracted as described in Methods. Values represent means ± standard deviations (in micrograms per gram of fresh weight) of four independent samples, each containing 80 mg of 3-week-old plants. All the mutant values were significantly different ( $P < 0.05$ ) from those of the corresponding wild type (Col-0 for *sca3-3* and *Ler* for *sca3-1*), the only exception being the carotenoid content of *sca3-1/sca3-1* plants.
